# Supplementary material for: Factors associated with unintended pregnancy in Brazil: cross-sectional results from the Birth in Brazil National Survey, 2011/2012
Source: PubMed Central journal article supplement (PMC5073899; doi:10.1186/s12978-016-0227-8), 2016-10-17
Supplement: 12978_2016_227_MOESM1_ESM.pdf [file 12978_2016_227_MOESM1_ESM.pdf]

1 **Fatores associados à gravidez não planejada no Brasil: resultados da Pesquisa**  
2 **Nascer no Brasil, 2011/2012.**

3 **Resumo:**

4 **Introdução:** A gravidez não planejada é um grave problema de saúde pública no Brasil.

5 Ela é referida por mais da metade das mulheres que tiveram filhos, mas as  
6 características dessas mulheres é pouco conhecida. O objetivo deste estudo foi analisar a  
7 prevalência e a associação entre o planejamento da gestação com um conjunto de  
8 variáveis sociodemográficas, individuais e de antecedentes obstétricos.

9 **Método:** A pesquisa Nascer no Brasil é um estudo seccional com representatividade  
10 nacional, que entrevistou 23.894 puérperas. A informação sobre o planejamento da  
11 gravidez foi obtida na maternidade após o parto, sendo classificada em três categorias:  
12 queria engravidar, queria esperar mais tempo e não queria engravidar. Inicialmente foi  
13 testada a associação entre variáveis sociodemográficas, características individuais e  
14 antecedentes obstétricos com o planejamento da gestação utilizando-se modelo de  
15 regressão multinomial simples, calculando-se a razão de chances. As variáveis  
16 significativas na análise bivariada foram incluídas no modelo de regressão multinomial  
17 multivariado, mantendo-se no modelo final aquelas que apresentaram significância  
18 estatística menor que 5%.

19 **Resultados:** A gravidez não planejada foi referida por 55,4% das puérperas. Associou-  
20 se com querer esperar mais tempo para engravidar ter menos de 20 anos (OR = 1,89, IC  
21 95%: 1,68–2,14); cor da pele parda (OR = 1,15, IC 95%: 1,04–1,27) ou amarela (OR =  
22 1,56, IC 95%: 1,05–2,32); não ter companheiro (OR = 2,32, IC 95%: 1,99–2,71); não  
23 ter trabalho remunerado (OR = 1,15, IC 95%: 1,04–1,27); uso abusivo de bebidas  
24 alcoólicas (OR = 1,25, IC 95%: 1,04–1,50) e ter três ou mais filhos (OR = 2,01, IC  
25 95%: 1,63–2,47). Os mesmos fatores associaram-se com não querer engravidar, e a

26 força de associação foi geralmente mais forte. Mulheres com três ou mais partos  
27 anteriores apresentaram 14 vezes a chance de não querer engravidar e aquelas com  
28 complicações em gestações anteriores ou história de parto prematuro apresentaram  
29 chance 40% e 19% maior, respectivamente. Antecedente de óbito neonatal foi um fator  
30 de proteção tanto para aquelas que queriam esperar mais tempo (OR = 0,61, IC 95%:  
31 0,44–0,85) quanto para as que não queriam engravidar (OR = 0,44, IC 95%: 0,34–0,57).

32 **Conclusão:** O estudo confirmou a importância dos fatores de risco socioeconômicos e  
33 individuais no planejamento da gravidez, relatado também em outras pesquisas. Além  
34 disso, trouxe um conhecimento novo sobre a importância dos antecedentes obstétricos  
35 como óbito neonatal, prematuridade e complicações em gestações anteriores como  
36 fatores de risco para uma gravidez não planejada.

37 **Palavras-chave:** gravidez não planejada; fatores de risco; epidemiologia; Brasil.

38 **Keywords:** unintended pregnancy; unplanned pregnancy; risk factors; epidemiology;  
39 Brazil

40

#### 41 **Introdução:**

42 Por uma série de razões sociais e econômicas, a maioria dos casais deseja  
43 planejar o momento e o espaçamento da gravidez, evitando uma gestação indesejada.  
44 Entretanto, a gravidez não planejada para aquele momento (queria esperar mais tempo),  
45 ou não desejada em nenhum momento (não queria engravidar) [1], é um problema de  
46 saúde nos países desenvolvidos e de média e baixa renda [2,3]. Em 2012, a taxa de  
47 gravidez não planejada no mundo foi de 53 por 1000 mulheres de 15 a 44 anos de idade.  
48 A taxa mais elevada foi observada na África (80 por 1000), e a menor na Europa e  
49 Oceania (43 por 1000) [4]. Nos Estados Unidos, quase metade das gestações não são

50 planejadas [5].

51 Vários fatores de risco são identificados com o não planejamento da gravidez. A  
52 literatura aponta como principais fatores a baixa condição socioeconômica, falta de  
53 apoio social, idade materna, parição e hábitos maternos como tabagismo e consumo de  
54 bebidas alcoólicas [6,7]. Esses fatores têm se mostrado estáveis nas diferentes culturas.  
55 Uma consequência frequente da gravidez não planejada é a sua interrupção por meio do  
56 aborto, muitas vezes realizado em condições não seguras, particularmente nos países em  
57 que esta prática é considerada ilegal. Além disso, a gravidez não planejada está  
58 associada com desfechos maternos e neonatais desfavoráveis como o início tardio do  
59 pré-natal e parto prematuro, além de efeitos negativos sobre a saúde física e mental da  
60 mãe e da criança [8-10]. Todos estes fatores aumentam os custos do cuidado neonatal e  
61 estão associados com incapacidades de longo prazo para as mulheres e os bebês [11,12].

62 No Brasil, a gravidez não planejada permanece elevada a despeito da drástica  
63 redução da taxa de fecundidade observada nas últimas décadas, atingindo 1,8 filhos por  
64 mulher em idade fértil em 2011[13], e do uso disseminado de métodos contraceptivos.  
65 Segundo o última Pesquisa Nacional de Demografia e Saúde (PNDS), realizada em  
66 2006, 67,8% das mulheres que tiveram relações sexuais nos últimos 12 meses estavam  
67 usando algum método contraceptivo moderno. A pesquisa também revelou que 53,9%  
68 de todos os nascimentos ocorridos nos últimos 5 anos não foram planejados [14]. No  
69 Brasil, o aborto é uma prática legal somente em casos de estupro, quando há risco de  
70 vida para a mãe, ou o feto apresenta anencefalia ou outra anomalia congênita  
71 incompatível com a vida extra-uterina. Consequentemente, a taxa de nascimentos  
72 decorrentes de gestações não planejadas é elevada [11].

73 Considerando a importância da gravidez não planejada sobre a saúde da mulher  
74 e seus filhos, o objetivo deste estudo foi analisar a associação entre o planejamento da

75 gravidez com variáveis sociodemográficas, fatores individuais e história obstétrica  
76 entre as mulheres que tiveram seus bebês nos hospitais incluídos na pesquisa Nacer no  
77 Brasil, entre 2011 e 2012.

78

## 79 **Métodos**

### 80 *Amostra e desenho do estudo*

81 A pesquisa Nacer no Brasil é um estudo com representatividade nacional, que  
82 entrevistou 23.894 mulheres após o parto e coletou informações dos prontuários das  
83 mães e seus filhos, no período de fevereiro de 2011 a outubro de 2012. A amostra foi  
84 selecionada em três estágios. Primeiro foram selecionados os hospitais que  
85 apresentaram 500 ou mais nascimentos em 2007. Os hospitais foram classificados de  
86 acordo com as cinco macrorregiões (norte, nordeste, sudeste, sul e centro-oeste),  
87 localização (capital e não-capital) e tipo de hospital (público, misto ou privado). No  
88 segundo estágio foi calculado o número de dias necessários para alcançar o tamanho  
89 fixo de 90 puérperas em cada hospital selecionado (mínimo de sete dias em cada  
90 hospital). No último estágio foram selecionadas 90 puérperas em cada hospital da  
91 amostra. A amostra foi distribuída em 266 hospitais em 191 municípios, incluindo todas  
92 as capitais. Consideramos elegíveis todas as puérperas que deram à luz a um nascido  
93 vivo, independente do peso e idade gestacional, ou nascido morto com peso superior a  
94 500 gramas ou idade gestacional maior que 22 semanas.

95 Na primeira fase do estudo foram realizadas entrevistas face a face durante a  
96 internação para o parto, coletadas informações do prontuário das mães e seus filhos, e  
97 fotografados os cartões de pré-natal. Formulários eletrônicos foram desenvolvidos e

98 validados para a coleta de dados, além de manuais com a descrição dos procedimentos  
99 da pesquisa, a fim de garantir a qualidade dos dados e minimizar os erros sistemáticos.  
100 As entrevistas foram realizadas por entrevistadores treinados pela coordenação da  
101 pesquisa e os supervisores do trabalho de campo replicaram 5% da amostra.

102 Por se tratar de uma amostra complexa, utilizou-se procedimentos de calibração  
103 e pesos amostrais para garantir a coerência das estimativas amostrais com os totais  
104 populacionais obtidos de fonte externa. Maiores detalhes sobre a amostra podem ser  
105 encontrados em Vasconcellos et al. [15].

### 106 ***Variáveis do estudo***

107 A variável desfecho foi o planejamento da gestação. As mulheres foram  
108 questionadas se a gravidez foi planejada, com três possibilidades de resposta: queria  
109 engravidar, queria esperar mais tempo ou não queria engravidar.

110 As seguintes variáveis foram incluídas no estudo para testar a associação com  
111 gravidez não planejada:

- 112 • Variáveis sociodemográficas: idade da mãe no momento do parto (< 20;  
113 20–34; ≥ 35); cor da pele (branca, preta, parda, amarela); e anos de  
114 estudo (≤7; 8–11; ≥ 12). As categorias de cor da pele basearam-se na  
115 classificação do Censo Demográfico.
- 116 • Variáveis individuais: situação conjugal (com ou sem companheiro); ter  
117 trabalho remunerado; consumo de bebidas alcoólicas e tabagismo; e  
118 parição (primípara, um filho, dois filhos, e três filhos ou mais)
- 119 • Desfechos obstétricos em gestações anteriores: óbito neonatal; natimorto;  
120 baixo peso (peso ao nascer < 2.500g), prematuridade (idade gestacional

121 < 37 semanas) e complicações graves durante a gestação (eclampsia,  
122 diabetes, hipertensão arterial e ruptura uterina).

123 O consumo de bebidas alcoólicas foi aferido utilizando-se o instrumento  
124 TWEAK, originalmente desenvolvido para identificar o hábito de ingestão de bebidas  
125 alcoólicas em gestantes [16]. Mulheres que obtiveram escore maior ou igual a três  
126 foram consideradas com risco de alcoolismo. A variável foi classificada em três  
127 categorias: não ingeriu bebidas alcoólicas na gestação; consumiu bebidas alcoólicas mas  
128 sem apresentar risco de alcoolismo; e consumiu bebidas alcoólicas com risco de  
129 alcoolismo. Foram consideradas fumantes as mulheres que relataram fumar pelo menos  
130 um cigarro por dia durante toda a gestação.

### 131 *Análise dos dados*

132 Inicialmente descrevemos as características das mulheres segundo o  
133 planejamento da gestação (queria engravidar, queria esperar mais tempo, não queria  
134 engravidar). Para estimar a associação com as variáveis do estudo, utilizamos modelo de  
135 análise multinomial, calculando-se as razões de chances e seus intervalos de confiança  
136 de 95%, tendo como categoria de referência “queria engravidar”. Todas as variáveis  
137 significativas na análise bivariada foram incluídas no modelo multinomial multivariado  
138 utilizando-se análise hierarquizada. Em cada bloco de variáveis (sociodemográficas,  
139 individuais e antecedents obstétricos), as variáveis significativas foram utilizadas para  
140 ajuste das variáveis do mesmo bloco e do bloco seguinte, restando-se no modelo final as  
141 variáveis que permaneceram significativas ao nível de 5%.

142 As análises foram realizadas com o pacote estatístico SPSS 17.0 (Chicago, IL,  
143 USA), e por ser tratar de uma amostra complexa utilizamos o módulo *Complex Sample*  
144 para correção do efeito de desenho. O estudo seguiu as recomendações do STROBE

145 (Strengthening the Reporting of Observational Studies in Epidemiology) para análise de  
146 estudos seccionais [17].

### 147 ***Considerações éticas***

148 As entrevistas hospitalares foram realizadas após a assinatura do Termo de  
149 Consentimento Livre e Esclarecido (TCLE) que incluía a autorização para contatos  
150 telefônicos posteriores. A pesquisa Nascer no Brasil foi aprovada pelo Comitê de Ética  
151 em Pesquisa, da Escola Nacional de Saúde Pública Sérgio Arouca, sob o número CAAE  
152 0096.0.031.000-10.

153

### 154 **Resultados**

155 Foram entrevistadas 23.894 puérperas. A prevalência de gravidez não planejada  
156 no estudo foi de 55,4%. A proporção de mulheres que referiu querer esperar mais tempo  
157 ou não queria engravidar foi 25,5% e 29,9%, respectivamente .

158 A Tabela 1 apresenta as características sociodemográficas, individuais e  
159 obstétricas do total da amostra e para os três grupos analisados (queria engravidar,  
160 queria esperar mais tempo, não queria engravidar) A maioria das mulheres tinha entre  
161 20 a 34 anos de idade (70,4%), era de cor parda (54,9%), tinha 12 anos ou mais de  
162 estudo (39%), vivia com companheiro (81,4%), não tinha trabalho remunerado (59,7%)  
163 e era primípara (4,5%). Em relação aos hábitos não saudáveis, 10% referiram consumo  
164 de bebidas alcoólicas e 9,6% consumo de cigarros durante a gestação.

165 Em relação à história obstétrica (excluindo a gestação atual e somente entre as  
166 múltíparas), os eventos mais frequentes foram a prematuridade (11,9%), baixo peso ao  
167 nascer (13,0%) e complicações graves na gestação (13,7%). Perda fetal e óbito neonatal  
168 foi referida por 4,4% e 3,4% das mulheres, respectivamente. É importante enfatizar que

169 estes resultados referem-se à gestações que terminaram no parto e todas as mulheres  
170 foram entrevistadas após o parto. Interrupções da gestação por aborto não foram  
171 incluídas no estudo.

172 Um perfil bastante distinto foi observado entre as mulheres que queriam  
173 engravidar em relação àquelas que queriam esperar mais tempo ou não queriam  
174 engravidar. Comparando-se os três grupos, as mulheres que queriam engravidar  
175 apresentavam maior proporção de idade  $\geq 35$  years (52%), eram majoritariamente de  
176 cor da pele branca (52,7%), elevado nível de escolaridade (59,3% com 12 anos ou mais  
177 de estudo), tinham companheiro (49,5%) e eram primíparas (51,5%). Entretanto,  
178 elevada proporção de hábitos não saudáveis, como uso de bebidas alcoólicas e fumo, foi  
179 observada em todos os grupos, mostrando forte associação destes hábitos entre as  
180 mulheres que não queriam engravidar. Em relação aos desfechos adversos em  
181 gestações anteriores entre as múltíparas, aquelas com história de natimorto ou neomorto  
182 apresentaram maior chance de querer engravidar. Mulheres com relato de nascimento de  
183 filhos prematuros ou com baixo peso, e aquelas que apresentaram complicações em  
184 gestações anteriores, apresentaram maior chance de não querer engravidar.

185

186 A Tabela 2 apresenta os resultados da análise de regressão multinomial  
187 bivariada. Todas as categoriais das variáveis sociodemográficas e individuais mostraram  
188 associação com a gravidez não planejada e foram incluídas no modelo multinomial  
189 multivariado. Querer esperar mais tempo ou não querer engravidar apresentou  
190 associação inversa e significativa com óbito neonatal prévio (OR = 0,61, IC 95%: 0,45–  
191 0,81 and OR = 0,61, IC 95% : 0,48–0,76, respectivamente). Não querer engravidar  
192 mostrou associação positiva e significativa com história de baixo peso (OR = 1,37, IC



193 95%: 1,18–1,59), prematuridade (OR = 1,44, IC 95%: 1,23–1,69) e complicações em  
194 gestações anteriores (OR = 1,21, IC 95%: 1,04–1,41).

195 A análise multivariada ajustada para cada bloco de variáveis (sociodemográfica,  
196 individual e obstétrica) confirmou os resultados da análise bivariada. Todas as variáveis  
197 que mantiveram associação com pelo menos uma categoria sob análise entre as  
198 mulheres que queriam esperar mais tempo ou não queriam engravidar entraram no  
199 modelo multivariado final, para identificar os fatores de risco da gravidez não planejada  
200 no Brasil.

201 O modelo final é apresentado na Tabela 3. As seguintes variáveis mantiveram  
202 associação positiva e estatisticamente significativa com querer esperar mais tempo:  
203 idade materna menor que 20 anos (OR = 1,89, IC 95%: 1,68–2,14); cor da pele parda  
204 (OR = 1,15, IC 95%: 1,04–1,27) ou amarela (OR = 1,56, IC 95%: 1,05–2,32); não ter  
205 companheiro (OR = 2,32, IC 95%: 1,99–2,71); não ter trabalho remunerado (OR = 1,15,  
206 IC 95%: 1,04–1,27); risco de alcoolismo (OR = 1,25, IC 95%: 1,04–1,50) e parição.  
207 Quanto maior o número de filhos, maior a chance de querer esperar mais tempo.

208 Resultados semelhantes foram observados entre as mulheres que não queriam  
209 engravidar, e a força da associação foi geralmente mais forte. Mulheres sem  
210 companheiro apresentaram 4,86 vezes a chance de não querer engravidar em relação  
211 àquelas que tinham companheiro. O mesmo efeito foi observado em relação à parição.  
212 Em comparação às primíparas, mulheres com dois filhos ou três filhos ou mais  
213 apresentaram, respectivamente, 6,96 e 14 vezes a chance de não querer engravidar.

214 Desfechos adversos em gestações anteriores foram fatores de risco para uma  
215 gestação não desejada. Comparada com as mulheres que queriam engravidar, aquelas  
216 com história prévia de complicações na gestação e parto prematuro apresetaram 40% e

217 19% mais chance, respectivamente, de não querer engravidar. Óbito neonatal, por outro  
218 lado, foi um fator de proteção tanto para querer esperar mais tempo como não querer  
219 engravidar (OR = 0,61, IC 95%: 0,44–0,85 e OR = 0,44, IC 95%: 0,34–0,57,  
220 respectivamente).

221

## 222 **Discussão**

223 Os resultados deste estudo sugerem que o Brasil tem uma alta prevalência de  
224 gravidez não planejada, que afeta mais de 50% das gestações que chegam ao parto [2,6].  
225 Resultados semelhantes são descritos na literatura nacional e internacional, indicando  
226 que menos da metade das mulheres relatam intenção de engravidar no momento em que  
227 ficam grávidas. De acordo com estimativas das Nações Unidas para 2012, cerca de 40%  
228 das gestações no mundo, ou 85 milhões de gestações, não foram planejadas. As regiões  
229 com maiores prevalências de gravidez não planejada foram a América Latina e o  
230 Caribe (56%), enquanto a mais baixa foi encontrada na África (35%) [4]. Como  
231 mencionado na introdução, o último estudo sobre planejamento reprodutivo no Brasil  
232 foi realizado em 2006 e mostrou que 53,9% das mulheres que tiveram filhos nos últimos  
233 cinco anos não planejaram a gravidez [14]. Mais recentemente, pesquisa com puérperas  
234 residentes em uma cidade da região sudeste do país mostrou que 65% não planejaram a  
235 gravidez [18].

236 Em relação aos fatores associados, a gravidez não planejada nesta amostra foi  
237 mais frequente entre as mulheres jovens, de cor parda ou amarela, de baixa  
238 escolaridade, sem companheiro, sem trabalho remunerado, fumantes e que fazem uso  
239 abusivo de bebidas alcoólicas. O efeito das variáveis sociodemográficas e individuais  
240 foi consistente com a literatura sobre o tema e mostrou o grau de vulnerabilidade social

241 destas mulheres [19-20]. Prietsch e colaboradores [18], investigando os fatores  
242 associados com a gravidez não planejada em uma amostra no sudeste do Brasil  
243 encontrou associação estatisticamente significativa entre as mulheres com a cor da pele  
244 preta ou parda, adolescente, solteira, baixa renda, fumante e múltipara.

245 No mundo, mulheres em idade fértil, independente da cor da pele e da situação  
246 socioeconômica encontram-se em risco de ter uma gravidez não planejada, porém a  
247 magnitude deste risco é variável, afetando principalmente o grupo de mulheres em  
248 maior desvantagem social [21,22].

249 A gravidez não planejada tem sido associada a vários fatores, incluindo hábitos  
250 não saudáveis. A mulher que vivencia uma gestação não planejada pode estar menos  
251 preparada para assumir mudanças de comportamento como adotar alimentação mais  
252 saudável ou parar de fumar quando comparada com aquelas com gravidez planejada.  
253 Estes fatores podem resultar em desfechos menos favoráveis [1,23].

254 A despeito da consistência com outros estudos, o efeito protetor da idade acima  
255 de 35 anos pode refletir as recentes mudanças no comportamento da fecundidade na  
256 população brasileira. Dados do Ministério da Saúde mostram que a taxa de fecundidade  
257 vem reduzindo nos últimos anos. De 2000 a 2010, a taxa de fecundidade entre as  
258 mulheres de 15 a 19 anos caiu de 18,8% para 17,7%, e entre as mulheres de 20 a 24  
259 anos passou de 29,3% para 27%. Embora o grupo etário de 20 a 24 anos contribua com  
260 a maior parcela da fecundidade no Brasil, a distribuição da fecundidade mostrava-se  
261 mais espalhada em 2010 do que em 2000, com aumento da participação das mulheres  
262 com 30 anos ou mais [24].

263 Além desses fatores, complicações em gestações anteriores e prematuridade  
264 apresentaram associação forte e significativa com a gravidez não planejada, mesmo

265 após o ajuste para as variáveis sociodemográficas e individuais. Esta associação também  
266 foi observada em estudo observacional prospectivo com 400 puérperas em um centro  
267 médico universitário nos Estados Unidos. Nesse estudo, mulheres com história prévia  
268 de parto prematuro também apresentaram maior chance de gravidez não planejada [12].  
269 Uma possível explicação é que os resultados adversos de uma gestação possam agir  
270 como gatilho para ansiedade, depressão e síndrome do estresse pós-traumático, eventos  
271 associados com o planejamento reprodutivo [25,26]. Mulheres com depressão e estresse  
272 apresentam maior probabilidade de uso inadequado de métodos contraceptivos,  
273 aumentando o risco de gravidez não planejada [27]. Outra possível explicação é que a  
274 prematuridade é o principal fator de risco para a mortalidade infantil e complicações no  
275 recém-nascido, e mães que passaram por esta experiência podem não se sentir seguras  
276 frente à uma nova gestação.

277 O efeito protetor da mortalidade neonatal para a gravidez não planejada pode ser  
278 explicada por diferentes mecanismos. Muitos pesquisadores acreditam que a intenção e  
279 decisão de ter uma gestação após uma experiência negativa como óbito neonatal é  
280 acompanhada de sentimentos de ambivalência, embora 50% a 60% das mães desejem  
281 nova gravidez após a perda de um bebê [28-30]. Alguns autores denominam esta  
282 decisão de “síndrome do bebê de substituição”, caracterizada por uma gravidez que vem  
283 substituir uma perda anterior [31]. Acredita-se que uma nova gravidez permitiria aos  
284 pais superar o luto pela morte de um filho [29,32].

285 Neste estudo, a experiência adversa em gestação anterior foi um fator de  
286 risco para uma gravidez não planejada. É importante compreender, além da  
287 abordagem médica, os aspectos psicológicos envolvidos no desejo de uma nova  
288 gestação e reconhecer os fatores contextuais que impedem ou facilitam a

289 capacidade da mulher de mudar seu comportamento e escolher o melhor  
290 momento para engravidar, assim como o melhor método para evitá-la.

291 O planejamento familiar é uma atribuição da atenção primária em saúde  
292 no Brasil por meio da Estratégia de Saúde da Família [33], entretanto ainda  
293 permanecem problemas de acesso e qualidade do cuidado. As necessidades de  
294 contracepção por parte da população, particularmente das mulheres em pior situação  
295 socioeconômica, baixa escolaridade e minorias étnicas, ainda não são adequadamente  
296 atendidas, contribuindo para elevada proporção de gravidez não planejada nesses grupos  
297 [34]. Vários fatores podem explicar a baixa cobertura e qualidade do planejamento  
298 familiar. Muitos profissionais que trabalham nesta área citam a sobrecarga de trabalho,  
299 número de consultas incompatíveis com a disponibilidade de recursos humanos, falta de  
300 suporte material e espaço físico adequado para as consultas, treinamento insuficiente  
301 dos profissionais e informações desatualizadas [35]. Por outro lado, as mulheres referem  
302 frequentemente pouca informação ou informação inadequada sobre os métodos  
303 contraceptivos disponíveis [36].

304 A implementação do aconselhamento periódico e a garantia de acesso aos  
305 métodos contraceptivos por todas as mulheres, especialmente para aquelas em maior  
306 risco de ter uma gravidez não planejada, deve ser o foco de uma política de  
307 planejamento familiar efetiva. Adicionalmente, deve-se compreender o contexto social  
308 e cultural em que a gravidez não planejada ocorre evitando-se atuar somente sobre  
309 fatores individuais. É importante integrar os determinantes sociais à rede de  
310 causalidade e criar intervenções que preencham as necessidades das mulheres e sua  
311 família, especialmente as mais vulneráveis. Compreender a persistência da elevada taxa  
312 de gravidez não planejada no mundo, a despeito da disponibilidade de vários métodos

313 contraceptivos, é uma questão importante para pesquisas futuras [37].

314 Apesar dos resultados relevantes é importante apontarmos as forças e limitações  
315 deste estudo. Sua principal força reside no fato de ser uma investigação baseada em uma  
316 amostra grande e representativa de todos os nascimentos no Brasil quando o estudo foi  
317 realizado, fornecendo resultados confiáveis e comparáveis sobre a prevalência e fatores  
318 de risco associados com o planejamento reprodutivo no Brasil.

319 Algumas limitações devem ser apontadas. Primeiro, a pergunta sobre a intenção  
320 de engravidar foi feita imediatamente após o parto, e gravidezes não planejadas podem  
321 ser interrompidas precocemente por abortos. Portanto, a prevalência de gravidez não  
322 planejada pode estar subestimada. Segundo, a intenção de engravidar é um processo  
323 complexo, e o diagnóstico da gravidez evoca muitas emoções que variam da  
324 preocupação e medo, a grande felicidade e emoção. Esses sentimentos variam durante a  
325 gravidez e mudam com o nascimento, o que pode ter influenciado as respostas das  
326 mulheres. Terceiro, neste estudo não foi questionado o uso de métodos contraceptivos.  
327 Acreditamos que esta informação seja importante para melhor compreensão dos fatores  
328 associados à gravidez não planejada. Entretanto, a falta desta variável não invalida os  
329 achados deste estudo. Sugerimos que pesquisas futuras examinem esta relação.

330

### 331 **Conclusões**

332 Este estudo revelou que a gravidez não planejada foi referida por 55,4% das  
333 puérperas entrevistadas. Ele também confirmou os achados de estudos prévios sobre a  
334 influência dos fatores de risco socioeconômicos e individuais na gravidez não planejada,  
335 afetando as mulheres mais vulneráveis. A gravidez não planejada pode afetar mulheres

336 de formas diferentes, segundo sua renda, cor da pele, situação conjugal e outras  
337 características. Além disso, os resultados do estudo incluem uma nova abordagem  
338 sobre o problema revelando a importância de desfechos negativos em gestações  
339 anteriores como fatores de risco para a gravidez não planejada. Face a elevada  
340 prevalência de gravidez não planejada em estudos nacionais (e confirmada nesta  
341 pesquisa), é necessário superar as barreiras e aumentar o acesso e a qualidade dos  
342 serviços de planejamento familiar, incluindo abordagem psicológica, e garantir maior  
343 adesão aos métodos contraceptivos disponíveis.

344

#### 345 **Conflito de interesse**

346 Os autores negam conflitos de interesse.

347

#### 348 **Contribuição dos autores**

349 MMTF concebeu o estudo, delineou e realizou as análises, escreveu o artigo e foi  
350 responsável por sua versão final. MLB e ACSAF delinearam o estudo, realizaram as  
351 análises e colaboraram na redação do artigo. SA colaborou na redação do artigo e  
352 revisou sua versão final. SGNG and MCL coordenaram a pesquisa Nacer no Brasil,  
353 colaboraram na redação do artigo e revisaram a versão final. Todos os autores  
354 colaboraram na interpretação dos resultados e aprovaram a versão final.

355

#### 356 **Agradecimentos**

357

358 Os autores agradecem a o apoio financeiro do CNPq, Faperj, DECIT/MS e da Escola  
359 Nacional de Saúde Pública da Fundação Oswaldo Cruz, assim como a todos os hospitais  
360 que participaram da pesquisa, a equipe de trabalho de campo e às mães que gentilmente  
361 concordaram em participar.

362

### 363 **Referências**

- 364 1. Mosher WD, Jones J, Abma JC. Intended and Unintended Births in the United  
365 States: 1982–2010. National health statistics reports; no 55. Hyattsville, MD:  
366 National Center for Health Statistics. 2012.
- 367 2. Exavery A, Kanté AM, Hingora A, Mbaruku G, Pemba S, Phillips JF. How  
368 mistimed and unwanted pregnancies affect timing of antenatal care initiation in  
369 three districts in Tanzania. *BMC Pregnancy Childbirth*. 2013, 13:35.
- 370 3. Lukasse M, Laanpere M, Karro H, Kristjansdottir H, Schroll AM, Van Parys AS  
371 et al. On behalf of the Bidens study group. Pregnancy intendedness and the  
372 association with physical, sexual and emotional abuse – a European multi-  
373 country cross-sectional study. *BMC Pregnancy and Childbirth*. 2015, 15:120.
- 374 4. Sedgh G, Singh S, Hussain R. Intended and Unintended Pregnancies Worldwide  
375 in 2012 and Recent Trends. *Stud Fam Plann*. 2014;45(3):301-314.
- 376 5. Kelly PJ. Unintended Pregnancy and the Social Determinants of Health. *Public*  
377 *Health Nurs*. 2014;31(5):385–386.
- 378 6. Finer LB, Zolna MR. Unintended pregnancy in the United States: Incidence and  
379 disparities. *Contraception*. 2011;84(5):478-485.



- 380 7. Langer A. El embarazo no deseado: impacto sobre la salud y la sociedad en  
381 América Latina y el Caribe. *Pan Am J Public Health*. 2002;11(3): 192-205.
- 382 8. Gipson JD, Koenig MA, Hindin MJ. The effects of unintended pregnancy on  
383 infant, child, and parental health: a review of the literature. *Stud Fam Plann*.  
384 2008; 39:18-38.
- 385 9. Kost K, Lindberg L. Pregnancy intentions, maternal behaviors, and infant  
386 health: investigating relationships with new measures and propensity score  
387 analysis. *Demography*. 2015; 52(1):83-111.
- 388 10. Faisal-Cury A, Menezes PR, Quayle J, Matijasevich A. Unplanned pregnancy  
389 and risk of maternal depression: secondary data analysis from a prospective  
390 pregnancy cohort, *Psychology, Health & Medicine*. 2016  
391 DOI:10.1080/13548506.2016.1153678
- 392 11. Le HH, Connolly MP, Bahamondes L, Cecatti JG, Yu J, Hu HX. The burden of  
393 unintended pregnancies in Brazil: a social and public health system cost  
394 analysis. *International Journal of Women's Health*. 2014;6:663-670.
- 395 12. Shah PS, Balkhair T, Ohlsson A, Beyene J, Scott F, Frick C. Intention to  
396 Become Pregnant and Low Birth Weight and Preterm Birth: A Systematic  
397 Review. *Matern Child Health J*. 2011;15:205–216.
- 398 13. Departamento de Informática do SUS (Datasis). Indicadores e Dados Básicos  
399 (IDB 2012). Brasil; 2012. <http://tabnet.datasus.gov.br/cgi/idb2012/a05b.htm>  
400 accessed 10th Jun, 2015.
- 401 14. Brasil. Pesquisa Nacional de Demografia e Saúde da Criança e da Mulher –  
402 PNDS 2006: dimensões do processo reprodutivo e da saúde da criança.  
403 Ministério da Saúde. Brasília; 2009.

- 404 15. Vasconcellos MTL, Silva PLN, Esteves-Pereira AP, Schilithz AOC, Souza  
405 Junior PRB, Szwarcwald CL. Sampling design for the Birth in Brazil: National  
406 Survey into Labour and Birth. *Cad Saúde Pública*. 2014;30 Suppl 1:S49-S58.
- 407 16. Sarkar M, Einarson G, Koren C. 2010. Comparing of effectiveness of TWEAK  
408 and T-ACE in determining problem drinkers in pregnancy. *Alcohol &*  
409 *Alcoholism*. 2010, 45(4):356-360.
- 410 17. Von Elm E, Altman DG, Egger M, Pocock S J, Gøtzsche PC, Vandenbroucke  
411 JP, & for the STROBE Initiative. The Strengthening the Reporting of  
412 Observational Studies in Epidemiology (STROBE) Statement: Guidelines for  
413 Reporting Observational Studies. *PLoS Medicine*. 2007;4(10):e296.
- 414 18. Prietsch SOM, González-Chica DA, Cesar JA, Mendoza-Sassi RA. Gravidez  
415 não planejada no extremo Sul do Brasil: prevalência e fatores associados. *Cad*  
416 *Saúde Pública*. 2011; 27(10):1906-1916.
- 417 19. Shreffler KM, Greil AL, Mitchell KS, McQuillan J. Variation in pregnancy  
418 intendedness across U.S. women's pregnancies. *Matern Child Health J*.  
419 2015;19(5):932-8.
- 420 20. Powers JR, Mc Dermott LJ, Loxton DJ, Chojenta CL. A Prospective Study of  
421 Prevalence and Predictors of Concurrent Alcohol and Tobacco Use During  
422 Pregnancy *Matern Child Health J*. 2013; 17:76-84.
- 423 21. Ikamari L, Izugbara C, Ochako R. Prevalence and determinants of unintended  
424 pregnancy among women in Nairobi, Kenya *BMC Pregnancy Childbirth*. 2013,  
425 13:69.
- 426 22. Levi A & Dau KQ. Meeting the National Health Goal to Reduce Unintended  
427 Pregnancy. *J Obstet Gynecol Neonatal Nurs*. 2011;40: 775-781.

- 428 23. Cheng D, Schwarz EB, Douglas E, Horon I. Unintended pregnancy and  
429 associated maternal preconception, prenatal and postpartum  
430 behaviors. *Contraception*. 2009;79:194–8.
- 431 24. Brasil. Health Brazil 2011: analysis of the health situation and the surveillance  
432 of the woman's health. Ministério da Saúde. Brasília, 2012.
- 433 25. Grekin R, O'Hara MW. Prevalence and risk factors of postpartum post  
434 traumatic stress disorder: a meta-analysis. *Clin Psychol Rev*. 2014;34(5):389-  
435 401.
- 436 26. Patel M, Bailey RK, Jabeen S, Ali S, Barker N, Osiezagha K. Postpaartum  
437 Depression: A Review. *Journal of Heath Care for the Poor and Underserved*.  
438 2012;23(1):534-542.
- 439 27. Stidham Hall K, Moreau C, Trussell J, Barber J. Young women's consistency of  
440 contraceptive use—does depression or stress matter? *Contraception*.  
441 2013;88(5):641–9.
- 442 28. Mills T, Ricklesford C, Cooke A, Heazell A, Whitworth M, Lavender T.  
443 Parents' experiences and expectations of care in pregnancy after stillbirth or  
444 neonatal death: a metasynthesis. *Int J Obstet Gynaecol*. 2014;121(8):943–50.
- 445 29. Osis MJD, Faúndes A, Makuch MY, Mello MB, Sousa MH, Araujo MJO.  
446 Family planning in Brazil today: an analysis of recent research. *Cad Saúde*  
447 *Pública*. 2006;22(11):2481-2490.
- 448 30. Estok P, Lehman A. Perinatal Death: Grief Support for Families. *Birth*.  
449 1983;10(1):17–28.
- 450 31. Robertson PA, Kavanaugh K. Supporting parents during and after a pregnancy  
451 subsequent to a perinatal loss. *J Perinat Neonatal Nurs*. 1998;12(2):63–71.
- 452 32. Frøen JF, Cacciatore J, McClure EM, Kuti O, Jokhio AH, Islam M, et al.

- 453 Stillbirths: why they matter. *Lancet Lond Engl.* 2011;377(9774):1353–66.
- 454 33. Brasil. Saúde sexual e saúde reprodutiva. Ministério da Saúde. Brasília, 2013.
- 455 34. Tavares LS, Leite IC, Telles FSP. Necessidade insatisfeita por métodos  
456 anticoncepcionais no Brasil. *Rev Bras Epidemiol.* 2007;10(2):139–48.
- 457 35. Moura ERF, Sousa RA. Education in reproductive health: proposal or reality in  
458 the Family Health Program? *Cad Saúde Pública.* 2002;18(6):1809–11.
- 459 36. Santos JC, Freitas PM. Family planning under the view of development. *Ciênc  
460 Saúde Coletiva.* 2011;16(3):1813–20.
- 461 37. Kavanaugh, ML. Moving beyond the individual in reproductive health:  
462 Exploring the social determinants of unintended pregnancy. PhD thesis.  
463 University of Pittsburgh, Department of Behavioral and Community Health.  
464 2008. [http://d-scholarship.pitt.edu/8006/1/KavanaughML\\_etd2008.pdf](http://d-scholarship.pitt.edu/8006/1/KavanaughML_etd2008.pdf) accessed  
465 15th Jun, 2015.
- 466
- 467
- 468
- 469
- 470
- 471
- 472

473 Tabela 1 – Planejamento da gravidez segundo variáveis sociodemográficas, individuais  
 474 e antecedentes obstétricos. Nascer no Brasil, 2011/2012.

475

| Variáveis                                                                 | Total |      | Queria engravidar | Queria esperar mais | Não queria engravidar |
|---------------------------------------------------------------------------|-------|------|-------------------|---------------------|-----------------------|
|                                                                           | N     | %    | %                 | %                   | %                     |
| <b>Variáveis sociodemográficas</b>                                        |       |      |                   |                     |                       |
| Idade (anos)                                                              |       |      |                   |                     |                       |
| < 20                                                                      | 4571  | 19,1 | 34,7              | 33,5                | 31,8                  |
| 20 - 34                                                                   | 16807 | 70,4 | 46,2              | 25,3                | 28,6                  |
| ≥ 35                                                                      | 2509  | 10,5 | 52,0              | 12,8                | 35,2                  |
| Anos de estudo                                                            |       |      |                   |                     |                       |
| ≤ 7 anos                                                                  | 6017  | 26,6 | 39,6              | 21,4                | 39,1                  |
| 8 - 11 anos                                                               | 12537 | 25,6 | 44,6              | 26,5                | 28,9                  |
| ≥12 anos                                                                  | 5472  | 39,0 | 59,3              | 24,8                | 16,0                  |
| Cor da pele                                                               |       |      |                   |                     |                       |
| Branca                                                                    | 8701  | 36,2 | 52,7              | 23,8                | 23,5                  |
| Preta                                                                     | 1879  | 7,8  | 40,8              | 23,1                | 36,1                  |
| Parda                                                                     | 13191 | 54,9 | 43,7              | 25,6                | 30,7                  |
| Amarela                                                                   | 265   | 1,1  | 41,3              | 29,9                | 28,8                  |
| <b>Variáveis individuais</b>                                              |       |      |                   |                     |                       |
| Situação conjugal                                                         |       |      |                   |                     |                       |
| Com companheiro                                                           | 19440 | 81,4 | 49,5              | 25,0                | 25,5                  |
| Sem companheiro                                                           | 4432  | 18,6 | 22,9              | 28,0                | 49,1                  |
| Trabalho remunerado                                                       |       |      |                   |                     |                       |
| Não                                                                       | 14272 | 59,7 | 40,5              | 26,6                | 32,8                  |
| Sim                                                                       | 9616  | 40,3 | 50,5              | 23,9                | 25,6                  |
| Consumo de bebidas alcoólicas                                             |       |      |                   |                     |                       |
| Não                                                                       | 20070 | 86,0 | 46,2              | 25,5                | 28,3                  |
| Sim, mas sem risco de alcoolismo                                          | 922   | 4,0  | 43,1              | 24,8                | 32,2                  |
| Sim, mas com risco de alcoolismo                                          | 2340  | 10,0 | 34,3              | 26,4                | 39,3                  |
| Tabagismo                                                                 |       |      |                   |                     |                       |
| Não                                                                       | 21579 | 90,4 | 45,7              | 26,2                | 28,1                  |
| Sim                                                                       | 2296  | 9,6  | 33,7              | 19,5                | 46,8                  |
| Parição                                                                   |       |      |                   |                     |                       |
| Primípara                                                                 | 9910  | 41,5 | 51,5              | 29,4                | 19,1                  |
| 1 filho                                                                   | 6697  | 28,0 | 46,6              | 26,0                | 27,5                  |
| 2 filhos                                                                  | 3702  | 15,5 | 33,0              | 19,1                | 47,9                  |
| 3 filhos e mais                                                           | 3575  | 15,0 | 22,5              | 14,9                | 62,6                  |
| <b>Desfechos obstétricos adversos em gestações anteriores<sup>a</sup></b> |       |      |                   |                     |                       |
| Óbito neonatal                                                            |       |      |                   |                     |                       |
| Não                                                                       | 12254 | 96,6 | 38,1              | 22,2                | 39,7                  |
| Sim                                                                       | 432   | 3,4  | 50,3              | 17,8                | 31,9                  |

|                                    |       |      |      |      |      |
|------------------------------------|-------|------|------|------|------|
| Natimorto                          |       |      |      |      |      |
| Não                                | 12129 | 95,6 | 35,7 | 16,6 | 32,7 |
| Sim                                | 558   | 4,4  | 41,3 | 20,5 | 38,3 |
| Prematuridade (IG < 37 semanas)    |       |      |      |      |      |
| Não                                | 11176 | 88,1 | 39,2 | 22,4 | 38,4 |
| Sim                                | 1510  | 11,9 | 33,2 | 19,9 | 46,9 |
| Baixo peso ao nascer (< 2500g)     |       |      |      |      |      |
| Não                                | 11039 | 87,0 | 39,1 | 22,6 | 38,4 |
| Sim                                | 1648  | 13,0 | 34,5 | 19,0 | 46,5 |
| Complicações maternas <sup>b</sup> |       |      |      |      |      |
| Não                                | 10774 | 86,3 | 38,7 | 22,5 | 38,8 |
| Sim                                | 1717  | 13,7 | 36,2 | 19,8 | 44,0 |

476 IG = idade gestacional

477 <sup>a</sup>Excluídas as primíparas

478 <sup>b</sup>Complicações em gestações anteriores (eclampsia, hipertensão arterial, rutura uterina  
479 ou diabetes)

480

481 Tabela 2 – Associação bruta entre as variáveis do estudo e o planejamento da gestação.  
 482 Nascer no Brasil, 2011/2012.

483

| Variável                                                                  | Queria esperar mais <sup>(a)</sup> |           | Não queria engravidar <sup>(a)</sup> |           |
|---------------------------------------------------------------------------|------------------------------------|-----------|--------------------------------------|-----------|
|                                                                           | OR                                 | IC 95%    | OR                                   | IC 95%    |
| <b>Variáveis sociodemográficas</b>                                        |                                    |           |                                      |           |
| Idade (anos)                                                              |                                    |           |                                      |           |
| < 20                                                                      | 1,76                               | 1,57–1,98 | 1,48                                 | 1,32–1,67 |
| 20 - 34                                                                   | 0,45                               | 0,39–0,52 | 1,09                                 | 0,97–1,24 |
| ≥ 35                                                                      | 1                                  | -         | 1                                    | -         |
| Anos de estudo                                                            |                                    |           |                                      |           |
| ≤ 7 anos                                                                  | 1,21                               | 1,05–1,39 | 3,37                                 | 2,94–3,88 |
| 8 - 11 anos                                                               | 1,32                               | 1,16–1,50 | 2,29                                 | 2,01–2,62 |
| ≥12 anos                                                                  | 1                                  |           | 1                                    |           |
| Cor da pele                                                               |                                    |           |                                      |           |
| Branca                                                                    | 1                                  | -         | 1                                    | -         |
| Preta                                                                     | 1,19                               | 1,00–1,42 | 1,75                                 | 1,49–2,06 |
| Parda                                                                     | 1,26                               | 1,15–1,40 | 1,49                                 | 1,35–1,65 |
| Amarela                                                                   | 1,66                               | 1,14–2,42 | 1,67                                 | 1,18–2,32 |
| <b>Variáveis individuais</b>                                              |                                    |           |                                      |           |
| Situação conjugal                                                         |                                    |           |                                      |           |
| Com companheiro                                                           | 1                                  | -         | 1                                    | -         |
| Sem companheiro                                                           | 2,42                               | 2,04–2,87 | 4,17                                 | 3,59–4,85 |
| Trabalho remunerado                                                       |                                    |           |                                      |           |
| Não                                                                       | 1                                  | -         | 1                                    | -         |
| Sim                                                                       | 1,39                               | 1,26–1,53 | 1,60                                 | 1,46–1,75 |
| Consumo de bebidas alcoólicas                                             |                                    |           |                                      |           |
| Não                                                                       | 1                                  | -         | 1                                    | -         |
| Sim, mas sem risco de alcoolismo                                          | 1,04                               | 0,83–1,31 | 1,22                                 | 0,98–1,52 |
| Sim, mas com risco de alcoolismo                                          | 1,40                               | 1,17–1,67 | 1,87                                 | 1,64–2,14 |
| Tabagismo                                                                 |                                    |           |                                      |           |
| Não                                                                       | 1                                  | -         | 1                                    | -         |
| Sim                                                                       | 1,01                               | 0,86–1,18 | 2,26                                 | 1,98–2,57 |
| Parição                                                                   |                                    |           |                                      |           |
| Primípara                                                                 | 1                                  | -         | 1                                    | -         |
| 1 filho                                                                   | 0,97                               | 0,87–1,09 | 1,59                                 | 1,41–1,80 |
| 2 filhos                                                                  | 1,02                               | 0,88–1,16 | 3,92                                 | 3,34–4,60 |
| 3 filhos ou mais                                                          | 1,16                               | 0,96–1,40 | 7,51                                 | 6,35–8,88 |
| <b>Desfechos obstétricos adversos em gestações anteriores<sup>b</sup></b> |                                    |           |                                      |           |
| Óbito neonatal                                                            |                                    |           |                                      |           |
| Não                                                                       | 1                                  |           | 1                                    |           |
| Sim                                                                       | 0,61                               | 0,46–0,81 | 0,61                                 | 0,48–0,76 |
| Natimorto                                                                 |                                    |           |                                      |           |
| Não                                                                       | 1                                  |           | 1                                    |           |
| Sim                                                                       | 0,86                               | 0,63–1,16 | 0,90                                 | 0,69–1,17 |

|                                    |      |           |      |           |
|------------------------------------|------|-----------|------|-----------|
| Prematuridade (IG < 37 semanas)    |      |           |      |           |
| Não                                | 1    |           | 1    |           |
| Sim                                | 1,05 | 0,80–1,29 | 1,44 | 1,23–1,69 |
| Baixo peso ao nascer (< 2500g)     |      |           |      |           |
| Não                                | 1    |           | 1    |           |
| Sim                                | 0,95 | 0,80–1,14 | 1,37 | 1,18–1,59 |
| Complicações maternas <sup>c</sup> |      |           |      |           |
| Não                                | 1    |           | 1    |           |
| Sim                                | 0,95 | 0,81–1,12 | 1,22 | 1,04–1,42 |

484 IG = idade gestacional

485 <sup>(a)</sup> Categoria de referência: Queria engravidar

486 <sup>b</sup>Excluídas as primíparas

487 <sup>c</sup>Complicações em gestações anteriores (eclampsia, hipertensão arterial, rutura uterina  
488 ou diabetes)

489

490



491 Tabela 3 – Modelo multinomial final ajustado do planejamento da gestação. Nascer no  
 492 Brasil, 2011/2012.

493

| Variáveis                                                                 | Queria esperar mais <sup>(a)</sup> |           | Não queria engravidar <sup>(a)</sup> |             |
|---------------------------------------------------------------------------|------------------------------------|-----------|--------------------------------------|-------------|
|                                                                           | OR                                 | IC 95%    | OR                                   | IC 95%      |
| Idade (anos)                                                              |                                    |           |                                      |             |
| < 20                                                                      | 1,89                               | 1,68–2,14 | 2,42                                 | 2,10–2,79   |
| 20 - 34                                                                   | 0,43                               | 0,37–0,51 | 0,75                                 | 0,64–0,88   |
| ≥ 35                                                                      | 1                                  |           | 1                                    |             |
| Anos de estudo                                                            |                                    |           |                                      |             |
| ≤ 7 anos                                                                  | 0,72                               | 0,63–0,83 | 1,04                                 | 0,89–1,21   |
| 8 - 11 anos                                                               | 0,99                               | 0,87–1,12 | 1,38                                 | 1,21–1,58   |
| ≥12 anos                                                                  | 1                                  |           | 1                                    |             |
| Cor da pele                                                               |                                    |           |                                      |             |
| Branca                                                                    | 1                                  |           | 1                                    |             |
| Preta                                                                     | 1,10                               | 0,91–1,32 | 1,34                                 | 1,16–1,56   |
| Parda                                                                     | 1,15                               | 1,04–1,27 | 1,20                                 | 1,08–1,34   |
| Amarela                                                                   | 1,56                               | 1,05–2,32 | 1,39                                 | 0,93–2,08   |
| Situação conjugal                                                         |                                    |           |                                      |             |
| Com companheiro                                                           | 1                                  |           | 1                                    |             |
| Sem companheiro                                                           | 2,32                               | 1,99–2,71 | 4,86                                 | 4,12–5,74   |
| Trabalho remunerado                                                       |                                    |           |                                      |             |
| Não                                                                       | 1                                  |           | 1                                    |             |
| Sim                                                                       | 1,15                               | 1,04–1,27 | 1,14                                 | 1,04–1,25   |
| Consumo de bebidas alcoólicas                                             |                                    |           |                                      |             |
| Não                                                                       | 1                                  |           | 1                                    |             |
| Sim, mas sem risco de alcoolismo                                          | 1,12                               | 0,90–1,39 | 1,21                                 | 0,96–1,53   |
| Sim, mas com risco de alcoolismo                                          | 1,25                               | 1,04–1,50 | 1,36                                 | 1,17–1,58   |
| Tabagismo                                                                 |                                    |           |                                      |             |
| Não                                                                       | 1                                  |           |                                      |             |
| Sim                                                                       | 0,87                               | 0,73–1,04 | 1,23                                 | 1,06–1,43   |
| Parição                                                                   |                                    |           |                                      |             |
| Primípara                                                                 | 1                                  |           |                                      |             |
| 1 filho                                                                   | 1,30                               | 1,16–1,46 | 2,49                                 | 2,15–2,88   |
| 2 filhos                                                                  | 1,55                               | 1,34–1,80 | 6,96                                 | 5,81–8,33   |
| 3 filhos e mais                                                           | 2,01                               | 1,63–2,47 | 14,00                                | 11,29–17,35 |
| <b>Desfechos obstétricos adversos em gestações anteriores<sup>b</sup></b> |                                    |           |                                      |             |
| Óbito neonatal                                                            |                                    |           |                                      |             |
| Não                                                                       | 1                                  |           | 1                                    |             |
| Sim                                                                       | 0,61                               | 0,44–0,85 | 0,44                                 | 0,34–0,57   |
| Prematuridade (IG < 37 semanas)                                           |                                    |           |                                      |             |
| Não                                                                       | 1                                  |           | 1                                    |             |
| Sim                                                                       | 1,16                               | 0,91–1,48 | 1,40                                 | 1,16–1,67   |
| Baixo peso ao nascer (< 2500g)                                            |                                    |           |                                      |             |

|                                    |      |           |      |           |
|------------------------------------|------|-----------|------|-----------|
| Não                                | 1    |           | 1    |           |
| Sim                                | 0,92 | 0,74–1,14 | 1,14 | 0,97–1,35 |
| Complicações maternas <sup>c</sup> |      |           |      |           |
| Não                                | 1    |           | 1    |           |
| Sim                                | 0,99 | 0,84–1,17 | 1,19 | 1,02–1,40 |

494 IG = idade gestacional

495 <sup>(a)</sup> Categoria de referência: Queria engravidar

496 <sup>b</sup>Excluídas as primíparas

497 <sup>c</sup>Complicações em gestações anteriores (eclampsia, hipertensão arterial, rutura uterina  
498 ou diabetes)

499
